# Supplementary material
Source: publisher figshare collection journal article supplement (https://acs.figshare.com/ndownloader/files/4214029)
Supplement: Supplementary file 1 [file 4214029]

data_7

_publ_contact_author             'Yasuhiro Kubota'
_publ_contact_author_email            ' kubota@gifu-u.ac.jp '

loop_
_publ_author_name
' Yasuhiro Kubota '
' Masaki Matsui '  
 
_audit_creation_method            SHELXL-97 
_chemical_name_systematic 
; 
 phenyl BPh2  
; 
_chemical_name_common             ' Ph_BPh2 '  
_chemical_melting_point           234-235  
_chemical_formula_moiety          'C25 H21 B N2 O'  
_chemical_formula_sum 
 'C25 H21 B N2 O' 
_chemical_formula_weight          376.25 
 
loop_ 
 _atom_type_symbol 
 _atom_type_description 
 _atom_type_scat_dispersion_real 
 _atom_type_scat_dispersion_imag 
 _atom_type_scat_source 
 'C'  'C'   0.0033   0.0016 
 'International Tables Vol C Tables 4.2.6.8 and 6.1.1.4' 
 'H'  'H'   0.0000   0.0000 
 'International Tables Vol C Tables 4.2.6.8 and 6.1.1.4' 
 'B'  'B'   0.0013   0.0007 
 'International Tables Vol C Tables 4.2.6.8 and 6.1.1.4' 
 'N'  'N'   0.0061   0.0033 
 'International Tables Vol C Tables 4.2.6.8 and 6.1.1.4' 
 'O'  'O'   0.0106   0.0060 
 'International Tables Vol C Tables 4.2.6.8 and 6.1.1.4' 
 
_symmetry_cell_setting            monoclinic 
_symmetry_space_group_name_H-M    'P 21/c'  
 
loop_ 
 _symmetry_equiv_pos_as_xyz 
 'x, y, z' 
 '-x, y+1/2, -z+1/2' 
 '-x, -y, -z' 
 'x, -y-1/2, z-1/2' 
 
_cell_length_a                    8.812(4) 
_cell_length_b                    11.747(6) 
_cell_length_c                    19.548(10) 
_cell_angle_alpha                 90.00 
_cell_angle_beta                  90.680(7) 
_cell_angle_gamma                 90.00 
_cell_volume                      2023.4(17) 
_cell_formula_units_Z             4 
_cell_measurement_temperature     293(2) 
_cell_measurement_reflns_used     ? 
_cell_measurement_theta_min       ? 
_cell_measurement_theta_max       ? 
 
_exptl_crystal_description        'block'  
_exptl_crystal_colour             'yellow'  
_exptl_crystal_size_max           0.20 
_exptl_crystal_size_mid           0.20 
_exptl_crystal_size_min           0.20 
_exptl_crystal_density_meas       ? 
_exptl_crystal_density_diffrn     1.235 
_exptl_crystal_density_method     'not measured' 
_exptl_crystal_F_000              792 
_exptl_absorpt_coefficient_mu     0.075 
_exptl_absorpt_correction_type    integration 
_exptl_absorpt_correction_T_min   0.9852 
_exptl_absorpt_correction_T_max   0.9852 
_exptl_absorpt_process_details    ? 
 
_exptl_special_details 
; 
 ? 
; 
 
_diffrn_ambient_temperature       293(2) 
_diffrn_radiation_wavelength      0.71075 
_diffrn_radiation_type            MoK\a 
_diffrn_radiation_source          'fine-focus sealed tube' 
_diffrn_radiation_monochromator   graphite 
_diffrn_measurement_device_type   'Rigaku/MSC Mercury CCD'  
_diffrn_measurement_method        ? 
_diffrn_detector_area_resol_mean  ? 
_diffrn_standards_number          ? 
_diffrn_standards_interval_count  ? 
_diffrn_standards_interval_time   ? 
_diffrn_standards_decay_%         ? 
_diffrn_reflns_number             15796 
_diffrn_reflns_av_R_equivalents   0.0242 
_diffrn_reflns_av_sigmaI/netI     0.0245 
_diffrn_reflns_limit_h_min        -11 
_diffrn_reflns_limit_h_max        9 
_diffrn_reflns_limit_k_min        -15 
_diffrn_reflns_limit_k_max        15 
_diffrn_reflns_limit_l_min        -25 
_diffrn_reflns_limit_l_max        18 
_diffrn_reflns_theta_min          2.31 
_diffrn_reflns_theta_max          27.50 
_reflns_number_total              4633 
_reflns_number_gt                 3695 
_reflns_threshold_expression      >2sigma(I) 
 
_computing_data_collection        ? 
_computing_cell_refinement        ? 
_computing_data_reduction         ? 
_computing_structure_solution     'SHELXS-97 (Sheldrick, 1990)' 
_computing_structure_refinement   'SHELXL-97 (Sheldrick, 1997)' 
_computing_molecular_graphics     ? 
_computing_publication_material   ? 
 
_refine_special_details 
; 
 Refinement of F^2^ against ALL reflections.  The weighted R-factor wR and 
 goodness of fit S are based on F^2^, conventional R-factors R are based 
 on F, with F set to zero for negative F^2^. The threshold expression of 
 F^2^ > 2sigma(F^2^) is used only for calculating R-factors(gt) etc. and is 
 not relevant to the choice of reflections for refinement.  R-factors based 
 on F^2^ are statistically about twice as large as those based on F, and R- 
 factors based on ALL data will be even larger. 
; 
 
_refine_ls_structure_factor_coef  Fsqd  
_refine_ls_matrix_type            full 
_refine_ls_weighting_scheme       calc  
_refine_ls_weighting_details 
 'calc w=1/[\s^2^(Fo^2^)+(0.0808P)^2^+0.1168P] where P=(Fo^2^+2Fc^2^)/3' 
_atom_sites_solution_primary      direct 
_atom_sites_solution_secondary    difmap 
_atom_sites_solution_hydrogens    geom 
_refine_ls_hydrogen_treatment     mixed 
_refine_ls_extinction_method      none 
_refine_ls_extinction_coef        ? 
_refine_ls_number_reflns          4633 
_refine_ls_number_parameters      346 
_refine_ls_number_restraints      0 
_refine_ls_R_factor_all           0.0649 
_refine_ls_R_factor_gt            0.0519 
_refine_ls_wR_factor_ref          0.1591 
_refine_ls_wR_factor_gt           0.1465 
_refine_ls_goodness_of_fit_ref    1.105 
_refine_ls_restrained_S_all       1.105 
_refine_ls_shift/su_max           0.053 
_refine_ls_shift/su_mean          0.007 
 
loop_ 
 _atom_site_label 
 _atom_site_type_symbol 
 _atom_site_fract_x 
 _atom_site_fract_y 
 _atom_site_fract_z 
 _atom_site_U_iso_or_equiv 
 _atom_site_adp_type 
 _atom_site_occupancy 
 _atom_site_symmetry_multiplicity 
 _atom_site_calc_flag 
 _atom_site_refinement_flags 
 _atom_site_disorder_assembly 
 _atom_site_disorder_group 
B1 B 0.75314(17) -0.03322(13) 0.64952(7) 0.0487(3) Uani 1 1 d . . . 
N1 N 0.83596(12) -0.08358(9) 0.58136(6) 0.0486(3) Uani 1 1 d . . . 
C1 C 0.93825(15) -0.16892(13) 0.58394(8) 0.0555(3) Uani 1 1 d . . . 
H1 H 0.9755(18) -0.1933(14) 0.6317(10) 0.072(5) Uiso 1 1 d . . . 
C2 C 0.98972(16) -0.22179(13) 0.52569(8) 0.0600(4) Uani 1 1 d . . . 
N2 N 0.94312(14) -0.18565(12) 0.46327(7) 0.0664(4) Uani 1 1 d . . . 
C3 C 0.84634(18) -0.10029(15) 0.46094(8) 0.0629(4) Uani 1 1 d . . . 
H3 H 0.810(2) -0.0698(17) 0.4130(11) 0.090(6) Uiso 1 1 d . . . 
C4 C 0.78704(14) -0.04604(12) 0.51943(7) 0.0507(3) Uani 1 1 d . . . 
C5 C 0.68261(15) 0.04610(13) 0.51544(7) 0.0542(3) Uani 1 1 d . . . 
H5 H 0.6447(18) 0.0664(14) 0.4719(9) 0.069(5) Uiso 1 1 d . . . 
C6 C 0.65128(15) 0.11095(12) 0.57097(7) 0.0508(3) Uani 1 1 d . . . 
C7 C 1.0957(3) -0.32138(19) 0.52884(13) 0.0812(5) Uani 1 1 d . . . 
H7 H 1.046(3) -0.385(3) 0.5195(17) 0.151(12) Uiso 1 1 d . . . 
H7A H 1.134(3) -0.337(3) 0.5755(17) 0.150(11) Uiso 1 1 d . . . 
H7B H 1.155(4) -0.330(3) 0.485(2) 0.176(12) Uiso 1 1 d . . . 
C8 C 0.55867(15) 0.21583(12) 0.56979(7) 0.0544(3) Uani 1 1 d . . . 
C9 C 0.49204(18) 0.25614(14) 0.51001(8) 0.0628(4) Uani 1 1 d . . . 
H9 H 0.5040(19) 0.2156(16) 0.4664(10) 0.080(5) Uiso 1 1 d . . . 
C10 C 0.4039(2) 0.35379(17) 0.51090(11) 0.0776(5) Uani 1 1 d . . . 
H10 H 0.353(2) 0.3824(17) 0.4682(12) 0.095(6) Uiso 1 1 d . . . 
C11 C 0.3823(3) 0.41192(18) 0.57110(12) 0.0895(6) Uani 1 1 d . . . 
H11 H 0.320(2) 0.482(2) 0.5699(11) 0.105(7) Uiso 1 1 d . . . 
C12 C 0.4483(3) 0.37307(19) 0.63034(12) 0.0991(7) Uani 1 1 d . . . 
H12 H 0.434(3) 0.414(2) 0.6737(15) 0.141(10) Uiso 1 1 d . . . 
C13 C 0.5367(2) 0.27568(16) 0.62975(9) 0.0802(5) Uani 1 1 d . . . 
H13 H 0.594(2) 0.246(2) 0.6722(13) 0.111(7) Uiso 1 1 d . . . 
C14 C 0.60525(14) -0.11248(12) 0.66211(6) 0.0508(3) Uani 1 1 d . . . 
C15 C 0.46246(18) -0.06539(18) 0.67483(8) 0.0675(4) Uani 1 1 d . . . 
H15 H 0.453(2) 0.0188(19) 0.6758(10) 0.090(6) Uiso 1 1 d . . . 
C16 C 0.3368(2) -0.1337(2) 0.68743(10) 0.0867(6) Uani 1 1 d . . . 
H16 H 0.240(3) -0.1063(19) 0.6943(12) 0.109(7) Uiso 1 1 d . . . 
C17 C 0.3488(2) -0.2492(2) 0.68847(9) 0.0878(6) Uani 1 1 d . . . 
H17 H 0.262(2) -0.3027(18) 0.6990(12) 0.102(6) Uiso 1 1 d . . . 
C18 C 0.4869(2) -0.29850(18) 0.67638(9) 0.0775(5) Uani 1 1 d . . . 
H18 H 0.504(2) -0.3771(17) 0.6753(11) 0.088(6) Uiso 1 1 d . . . 
C19 C 0.61218(18) -0.23074(14) 0.66268(8) 0.0607(4) Uani 1 1 d . . . 
H19 H 0.708(2) -0.2680(15) 0.6510(9) 0.071(5) Uiso 1 1 d . . . 
C20 C 0.87441(14) -0.02613(12) 0.71188(7) 0.0508(3) Uani 1 1 d . . . 
C21 C 0.97662(19) 0.06363(15) 0.71467(9) 0.0670(4) Uani 1 1 d . . . 
H21 H 0.973(2) 0.1218(17) 0.6791(11) 0.091(6) Uiso 1 1 d . . . 
C22 C 1.0815(2) 0.07334(19) 0.76761(12) 0.0895(6) Uani 1 1 d . . . 
H22 H 1.150(3) 0.135(2) 0.7631(14) 0.129(9) Uiso 1 1 d . . . 
C23 C 1.0878(2) -0.00598(19) 0.81908(10) 0.0844(6) Uani 1 1 d . . . 
H23 H 1.161(2) -0.0015(17) 0.8581(11) 0.095(6) Uiso 1 1 d . . . 
C24 C 0.9897(2) -0.09492(19) 0.81778(10) 0.0843(6) Uani 1 1 d . . . 
H24 H 0.994(2) -0.1525(19) 0.8562(13) 0.111(7) Uiso 1 1 d . . . 
C25 C 0.8830(2) -0.10444(16) 0.76488(9) 0.0731(5) Uani 1 1 d . . . 
H25 H 0.815(2) -0.1736(17) 0.7654(11) 0.091(6) Uiso 1 1 d . . . 
O1 O 0.70898(12) 0.08514(8) 0.63189(5) 0.0565(3) Uani 1 1 d . . . 
 
loop_ 
 _atom_site_aniso_label 
 _atom_site_aniso_U_11 
 _atom_site_aniso_U_22 
 _atom_site_aniso_U_33 
 _atom_site_aniso_U_23 
 _atom_site_aniso_U_13 
 _atom_site_aniso_U_12 
B1 0.0614(8) 0.0503(8) 0.0344(7) 0.0002(6) -0.0050(6) 0.0030(6) 
N1 0.0534(6) 0.0514(6) 0.0410(6) -0.0010(5) -0.0023(4) -0.0024(4) 
C1 0.0565(7) 0.0566(8) 0.0533(8) -0.0017(6) -0.0001(6) -0.0001(6) 
C2 0.0576(7) 0.0631(9) 0.0594(9) -0.0067(7) 0.0068(6) -0.0036(6) 
N2 0.0687(7) 0.0755(9) 0.0553(8) -0.0100(6) 0.0091(6) -0.0007(6) 
C3 0.0704(9) 0.0762(10) 0.0420(8) -0.0047(7) 0.0031(6) -0.0028(7) 
C4 0.0548(7) 0.0593(8) 0.0379(7) -0.0032(6) -0.0009(5) -0.0084(6) 
C5 0.0609(7) 0.0640(9) 0.0376(7) 0.0034(6) -0.0066(5) -0.0012(6) 
C6 0.0582(7) 0.0539(8) 0.0402(7) 0.0056(6) -0.0064(5) -0.0048(5) 
C7 0.0834(12) 0.0771(13) 0.0833(14) -0.0091(11) 0.0129(10) 0.0169(10) 
C8 0.0619(7) 0.0542(8) 0.0469(8) 0.0068(6) -0.0026(6) -0.0009(6) 
C9 0.0716(9) 0.0647(9) 0.0518(9) 0.0072(7) -0.0091(6) 0.0031(7) 
C10 0.0850(11) 0.0732(11) 0.0742(12) 0.0169(9) -0.0136(9) 0.0113(9) 
C11 0.1094(15) 0.0707(12) 0.0884(15) 0.0091(10) 0.0024(11) 0.0298(11) 
C12 0.153(2) 0.0786(13) 0.0663(12) -0.0018(10) 0.0027(12) 0.0392(13) 
C13 0.1201(14) 0.0689(11) 0.0515(9) 0.0013(8) -0.0059(9) 0.0246(10) 
C14 0.0572(7) 0.0644(8) 0.0306(6) 0.0029(5) -0.0061(5) 0.0010(6) 
C15 0.0660(9) 0.0868(12) 0.0499(9) 0.0025(8) 0.0034(6) 0.0075(8) 
C16 0.0598(9) 0.136(2) 0.0647(11) 0.0072(12) 0.0077(7) -0.0041(11) 
C17 0.0760(12) 0.1305(19) 0.0569(10) 0.0167(11) -0.0055(8) -0.0353(12) 
C18 0.0952(13) 0.0775(12) 0.0593(10) 0.0119(9) -0.0159(8) -0.0258(10) 
C19 0.0662(9) 0.0645(9) 0.0512(8) 0.0076(7) -0.0110(6) -0.0041(7) 
C20 0.0593(7) 0.0543(7) 0.0386(7) -0.0041(6) -0.0063(5) 0.0035(6) 
C21 0.0760(10) 0.0632(10) 0.0616(10) -0.0001(8) -0.0139(7) -0.0080(7) 
C22 0.0909(13) 0.0873(14) 0.0896(15) -0.0069(11) -0.0324(11) -0.0210(10) 
C23 0.0891(12) 0.1004(15) 0.0629(11) -0.0127(10) -0.0319(9) -0.0007(10) 
C24 0.1056(13) 0.0932(13) 0.0534(10) 0.0095(9) -0.0293(9) -0.0022(11) 
C25 0.0937(11) 0.0727(11) 0.0523(9) 0.0098(8) -0.0233(8) -0.0127(9) 
O1 0.0784(6) 0.0535(6) 0.0373(5) 0.0003(4) -0.0098(4) 0.0071(4) 
 
_geom_special_details 
; 
 All esds (except the esd in the dihedral angle between two l.s. planes) 
 are estimated using the full covariance matrix.  The cell esds are taken 
 into account individually in the estimation of esds in distances, angles 
 and torsion angles; correlations between esds in cell parameters are only 
 used when they are defined by crystal symmetry.  An approximate (isotropic) 
 treatment of cell esds is used for estimating esds involving l.s. planes. 
; 
 
loop_ 
 _geom_bond_atom_site_label_1 
 _geom_bond_atom_site_label_2 
 _geom_bond_distance 
 _geom_bond_site_symmetry_2 
 _geom_bond_publ_flag 
B1 O1 1.4833(19) . ? 
B1 C20 1.6137(19) . ? 
B1 C14 1.623(2) . ? 
B1 N1 1.6374(19) . ? 
N1 C1 1.3488(18) . ? 
N1 C4 1.3540(18) . ? 
C1 C2 1.379(2) . ? 
C1 H1 1.026(18) . ? 
C2 N2 1.351(2) . ? 
C2 C7 1.497(2) . ? 
N2 C3 1.317(2) . ? 
C3 C4 1.414(2) . ? 
C3 H3 1.05(2) . ? 
C4 C5 1.422(2) . ? 
C5 C6 1.357(2) . ? 
C5 H5 0.941(17) . ? 
C6 O1 1.3245(16) . ? 
C6 C8 1.478(2) . ? 
C7 H7 0.88(3) . ? 
C7 H7A 0.99(3) . ? 
C7 H7B 1.02(4) . ? 
C8 C13 1.382(2) . ? 
C8 C9 1.385(2) . ? 
C9 C10 1.386(2) . ? 
C9 H9 0.98(2) . ? 
C10 C11 1.376(3) . ? 
C10 H10 1.00(2) . ? 
C11 C12 1.368(3) . ? 
C11 H11 0.99(2) . ? 
C12 C13 1.384(3) . ? 
C12 H12 0.98(3) . ? 
C13 H13 1.03(2) . ? 
C14 C19 1.391(2) . ? 
C14 C15 1.399(2) . ? 
C15 C16 1.391(3) . ? 
C15 H15 0.99(2) . ? 
C16 C17 1.362(3) . ? 
C16 H16 0.92(2) . ? 
C17 C18 1.370(3) . ? 
C17 H17 1.02(2) . ? 
C18 C19 1.390(2) . ? 
C18 H18 0.936(19) . ? 
C19 H19 0.979(17) . ? 
C20 C25 1.387(2) . ? 
C20 C21 1.387(2) . ? 
C21 C22 1.384(2) . ? 
C21 H21 0.98(2) . ? 
C22 C23 1.372(3) . ? 
C22 H22 0.95(3) . ? 
C23 C24 1.356(3) . ? 
C23 H23 1.00(2) . ? 
C24 C25 1.394(2) . ? 
C24 H24 1.01(2) . ? 
C25 H25 1.01(2) . ? 
 
loop_ 
 _geom_angle_atom_site_label_1 
 _geom_angle_atom_site_label_2 
 _geom_angle_atom_site_label_3 
 _geom_angle 
 _geom_angle_site_symmetry_1 
 _geom_angle_site_symmetry_3 
 _geom_angle_publ_flag 
O1 B1 C20 107.25(11) . . ? 
O1 B1 C14 111.35(11) . . ? 
C20 B1 C14 116.16(11) . . ? 
O1 B1 N1 105.53(10) . . ? 
C20 B1 N1 109.62(11) . . ? 
C14 B1 N1 106.42(10) . . ? 
C1 N1 C4 118.76(12) . . ? 
C1 N1 B1 122.83(11) . . ? 
C4 N1 B1 118.01(11) . . ? 
N1 C1 C2 122.02(14) . . ? 
N1 C1 H1 116.6(9) . . ? 
C2 C1 H1 121.4(9) . . ? 
N2 C2 C1 120.33(14) . . ? 
N2 C2 C7 117.72(15) . . ? 
C1 C2 C7 121.94(16) . . ? 
C3 N2 C2 117.40(13) . . ? 
N2 C3 C4 124.08(14) . . ? 
N2 C3 H3 118.6(11) . . ? 
C4 C3 H3 117.3(11) . . ? 
N1 C4 C3 117.34(13) . . ? 
N1 C4 C5 119.72(12) . . ? 
C3 C4 C5 122.93(13) . . ? 
C6 C5 C4 121.40(12) . . ? 
C6 C5 H5 120.5(10) . . ? 
C4 C5 H5 117.7(10) . . ? 
O1 C6 C5 120.73(13) . . ? 
O1 C6 C8 114.26(12) . . ? 
C5 C6 C8 124.96(12) . . ? 
C2 C7 H7 110(2) . . ? 
C2 C7 H7A 112.8(18) . . ? 
H7 C7 H7A 101(3) . . ? 
C2 C7 H7B 111.4(19) . . ? 
H7 C7 H7B 90(3) . . ? 
H7A C7 H7B 127(2) . . ? 
C13 C8 C9 118.64(15) . . ? 
C13 C8 C6 119.58(13) . . ? 
C9 C8 C6 121.78(14) . . ? 
C10 C9 C8 120.30(16) . . ? 
C10 C9 H9 118.5(10) . . ? 
C8 C9 H9 121.2(11) . . ? 
C11 C10 C9 120.32(17) . . ? 
C11 C10 H10 118.7(12) . . ? 
C9 C10 H10 121.0(12) . . ? 
C12 C11 C10 119.81(19) . . ? 
C12 C11 H11 121.8(13) . . ? 
C10 C11 H11 118.3(13) . . ? 
C11 C12 C13 120.1(2) . . ? 
C11 C12 H12 120.6(15) . . ? 
C13 C12 H12 119.3(15) . . ? 
C8 C13 C12 120.79(17) . . ? 
C8 C13 H13 116.1(13) . . ? 
C12 C13 H13 123.1(13) . . ? 
C19 C14 C15 115.66(15) . . ? 
C19 C14 B1 122.62(13) . . ? 
C15 C14 B1 121.71(14) . . ? 
C16 C15 C14 121.51(19) . . ? 
C16 C15 H15 120.3(11) . . ? 
C14 C15 H15 118.2(11) . . ? 
C17 C16 C15 121.03(19) . . ? 
C17 C16 H16 114.7(15) . . ? 
C15 C16 H16 124.3(15) . . ? 
C16 C17 C18 119.17(18) . . ? 
C16 C17 H17 124.1(11) . . ? 
C18 C17 H17 116.7(12) . . ? 
C17 C18 C19 120.0(2) . . ? 
C17 C18 H18 124.3(13) . . ? 
C19 C18 H18 115.7(13) . . ? 
C18 C19 C14 122.59(17) . . ? 
C18 C19 H19 118.5(10) . . ? 
C14 C19 H19 118.8(10) . . ? 
C25 C20 C21 116.43(14) . . ? 
C25 C20 B1 124.04(13) . . ? 
C21 C20 B1 119.52(13) . . ? 
C22 C21 C20 121.30(18) . . ? 
C22 C21 H21 119.5(12) . . ? 
C20 C21 H21 119.2(11) . . ? 
C23 C22 C21 120.89(19) . . ? 
C23 C22 H22 124.4(16) . . ? 
C21 C22 H22 114.6(16) . . ? 
C24 C23 C22 119.28(16) . . ? 
C24 C23 H23 117.6(12) . . ? 
C22 C23 H23 123.1(12) . . ? 
C23 C24 C25 120.00(18) . . ? 
C23 C24 H24 118.8(12) . . ? 
C25 C24 H24 121.1(13) . . ? 
C20 C25 C24 122.09(17) . . ? 
C20 C25 H25 121.0(12) . . ? 
C24 C25 H25 116.8(12) . . ? 
C6 O1 B1 121.35(11) . . ? 
 
loop_ 
 _geom_torsion_atom_site_label_1 
 _geom_torsion_atom_site_label_2 
 _geom_torsion_atom_site_label_3 
 _geom_torsion_atom_site_label_4 
 _geom_torsion 
 _geom_torsion_site_symmetry_1 
 _geom_torsion_site_symmetry_2 
 _geom_torsion_site_symmetry_3 
 _geom_torsion_site_symmetry_4 
 _geom_torsion_publ_flag 
O1 B1 N1 C1 154.99(11) . . . . ? 
C20 B1 N1 C1 39.78(16) . . . . ? 
C14 B1 N1 C1 -86.59(14) . . . . ? 
O1 B1 N1 C4 -32.35(15) . . . . ? 
C20 B1 N1 C4 -147.56(12) . . . . ? 
C14 B1 N1 C4 86.07(13) . . . . ? 
C4 N1 C1 C2 -2.6(2) . . . . ? 
B1 N1 C1 C2 170.03(13) . . . . ? 
N1 C1 C2 N2 2.9(2) . . . . ? 
N1 C1 C2 C7 -176.02(16) . . . . ? 
C1 C2 N2 C3 -1.0(2) . . . . ? 
C7 C2 N2 C3 177.96(16) . . . . ? 
C2 N2 C3 C4 -1.1(2) . . . . ? 
C1 N1 C4 C3 0.55(19) . . . . ? 
B1 N1 C4 C3 -172.42(12) . . . . ? 
C1 N1 C4 C5 -178.15(12) . . . . ? 
B1 N1 C4 C5 8.88(18) . . . . ? 
N2 C3 C4 N1 1.3(2) . . . . ? 
N2 C3 C4 C5 179.97(14) . . . . ? 
N1 C4 C5 C6 12.1(2) . . . . ? 
C3 C4 C5 C6 -166.57(14) . . . . ? 
C4 C5 C6 O1 -4.9(2) . . . . ? 
C4 C5 C6 C8 172.53(12) . . . . ? 
O1 C6 C8 C13 -1.4(2) . . . . ? 
C5 C6 C8 C13 -178.99(15) . . . . ? 
O1 C6 C8 C9 178.91(13) . . . . ? 
C5 C6 C8 C9 1.3(2) . . . . ? 
C13 C8 C9 C10 -0.7(3) . . . . ? 
C6 C8 C9 C10 178.97(15) . . . . ? 
C8 C9 C10 C11 0.3(3) . . . . ? 
C9 C10 C11 C12 0.0(3) . . . . ? 
C10 C11 C12 C13 0.1(4) . . . . ? 
C9 C8 C13 C12 0.9(3) . . . . ? 
C6 C8 C13 C12 -178.85(19) . . . . ? 
C11 C12 C13 C8 -0.6(4) . . . . ? 
O1 B1 C14 C19 163.83(12) . . . . ? 
C20 B1 C14 C19 -73.03(17) . . . . ? 
N1 B1 C14 C19 49.31(15) . . . . ? 
O1 B1 C14 C15 -17.78(17) . . . . ? 
C20 B1 C14 C15 105.37(15) . . . . ? 
N1 B1 C14 C15 -132.30(13) . . . . ? 
C19 C14 C15 C16 0.3(2) . . . . ? 
B1 C14 C15 C16 -178.24(14) . . . . ? 
C14 C15 C16 C17 0.6(3) . . . . ? 
C15 C16 C17 C18 -0.5(3) . . . . ? 
C16 C17 C18 C19 -0.6(3) . . . . ? 
C17 C18 C19 C14 1.5(2) . . . . ? 
C15 C14 C19 C18 -1.3(2) . . . . ? 
B1 C14 C19 C18 177.16(13) . . . . ? 
O1 B1 C20 C25 144.10(15) . . . . ? 
C14 B1 C20 C25 18.8(2) . . . . ? 
N1 B1 C20 C25 -101.79(17) . . . . ? 
O1 B1 C20 C21 -34.96(17) . . . . ? 
C14 B1 C20 C21 -160.22(14) . . . . ? 
N1 B1 C20 C21 79.15(16) . . . . ? 
C25 C20 C21 C22 0.3(3) . . . . ? 
B1 C20 C21 C22 179.43(17) . . . . ? 
C20 C21 C22 C23 0.1(3) . . . . ? 
C21 C22 C23 C24 0.0(4) . . . . ? 
C22 C23 C24 C25 -0.6(3) . . . . ? 
C21 C20 C25 C24 -0.9(3) . . . . ? 
B1 C20 C25 C24 -179.98(17) . . . . ? 
C23 C24 C25 C20 1.1(3) . . . . ? 
C5 C6 O1 B1 -25.68(19) . . . . ? 
C8 C6 O1 B1 156.61(12) . . . . ? 
C20 B1 O1 C6 158.12(11) . . . . ? 
C14 B1 O1 C6 -73.78(15) . . . . ? 
N1 B1 O1 C6 41.29(16) . . . . ? 
 
_diffrn_measured_fraction_theta_max    0.995 
_diffrn_reflns_theta_full              27.50 
_diffrn_measured_fraction_theta_full   0.995 
_refine_diff_density_max    0.187 
_refine_diff_density_min   -0.152 
_refine_diff_density_rms    0.030 
